# Supplementary material for: Standardized Clinical Assessment and Management Plan Enhances Neonatal Outcomes in Prenatally Diagnosed Congenital Heart Disease
Source: Research Square preprint supplement (doi:10.21203/rs.3.rs-6260387/v1), 2025-03-28
Supplement: Supplementary file 1 [file cbca066f54554edc6d532abc.docx]

Table 1. Demographic data and neonatal outcomes

| P value | Intervention (n=247) | Historical (n=167) |  |
| --- | --- | --- | --- |
| <0.01 | 33.1 | 30.7 | Maternal Age (years) |
| 0.12 | 2 | 2 | Gravida(Median) |
| 0.94 | 1 | 1 | Parity(Mediam) |
| 0.04 | 2977 +/-709 | 2838+/-641 | Neonatal Birth weight (g) |
| 0.01 | 225(91.1) | 147(83.1) | Survival at discharge  n(%) |
| 0.81 | 81/90(90.0) | 40/45(88.8) | Survival at discharge -spontaneous birth n,total(%) |
| 0.11 | 54/56(96.4) | 36/40(90.0) | Survival at discharge -Induction of labor n,total(%) |
| 0.04 | 90/101(89.1) | 64/82(78.0) | Survival at discharge -Caesarean Birth  n,total(%) |
| <0.01 | 11.5 (3 – 40.8) | 26 (14 – 60) | Length of stay, days |

Values are *n(*%) or median (Q1-Q3), unless otherwise indicated

a Percentages displayed under survival at discharge – spontaneous birth represent (*n*) of pregnancies that reported a spontaneous vaginal delivery, not of total *n*

b Percentages displayed under survival at discharge – induction of labor represent (*n*) of pregnancies that reported an induction of labor, not of total *n*

c Percentages displayed under survival at discharge - cesarean birth represent (*n*) of pregnancies that reported a cesarean birth, not of total *n*

Table 2.

Characterization and neonatal outcomes by fetal CHD

| P value | Intervention (n=216) | Historical (n=167) | Cardiac Classification |
| --- | --- | --- | --- |
| | 0.029 | | --- | | | 44(20.4%) | | --- | | 67 (40.1%) | 0a |
| <0.01 | 110 (50.9%) | 60 (36.9%) | 1b |
| 0.03 | 35 (16.2%) | 19 (9.6%) | 2c |
| 0.53 | 22 (10.2%) | 18 (10.8%) | 3d |
| 0.48 | 5 (2.3%) | 3 (1.8%) | 4e |
|  | Intervention (n=195) | Historical (n=147) | Survived by Cardiac Classification |
| | 0.06 | | --- | | | 42(95.4%) | | --- | | 56 (83.6%) | Low Risk (Category 1) |
| 0.34 | 148 (88.6%) | 82 (84.5%) | High Risk (Category2-4) |
| 0.17 | 5 (100%) | 2 (66.7%) | Unknown |

a Category 1 cardiac lesion

b Category 2 cardiac lesion

c Category 3 cardiac lesion

d Category 4 cardiac lesion

e Unknown/other cardiac lesion
